# Supplementary material for: Dual Targeting of MEK and PI3K Pathways Attenuates Established and Progressive Pulmonary Fibrosis
Source: PubMed Central journal article supplement (PMC3903543; doi:10.1371/journal.pone.0086536), 2014-01-27

Figure S1

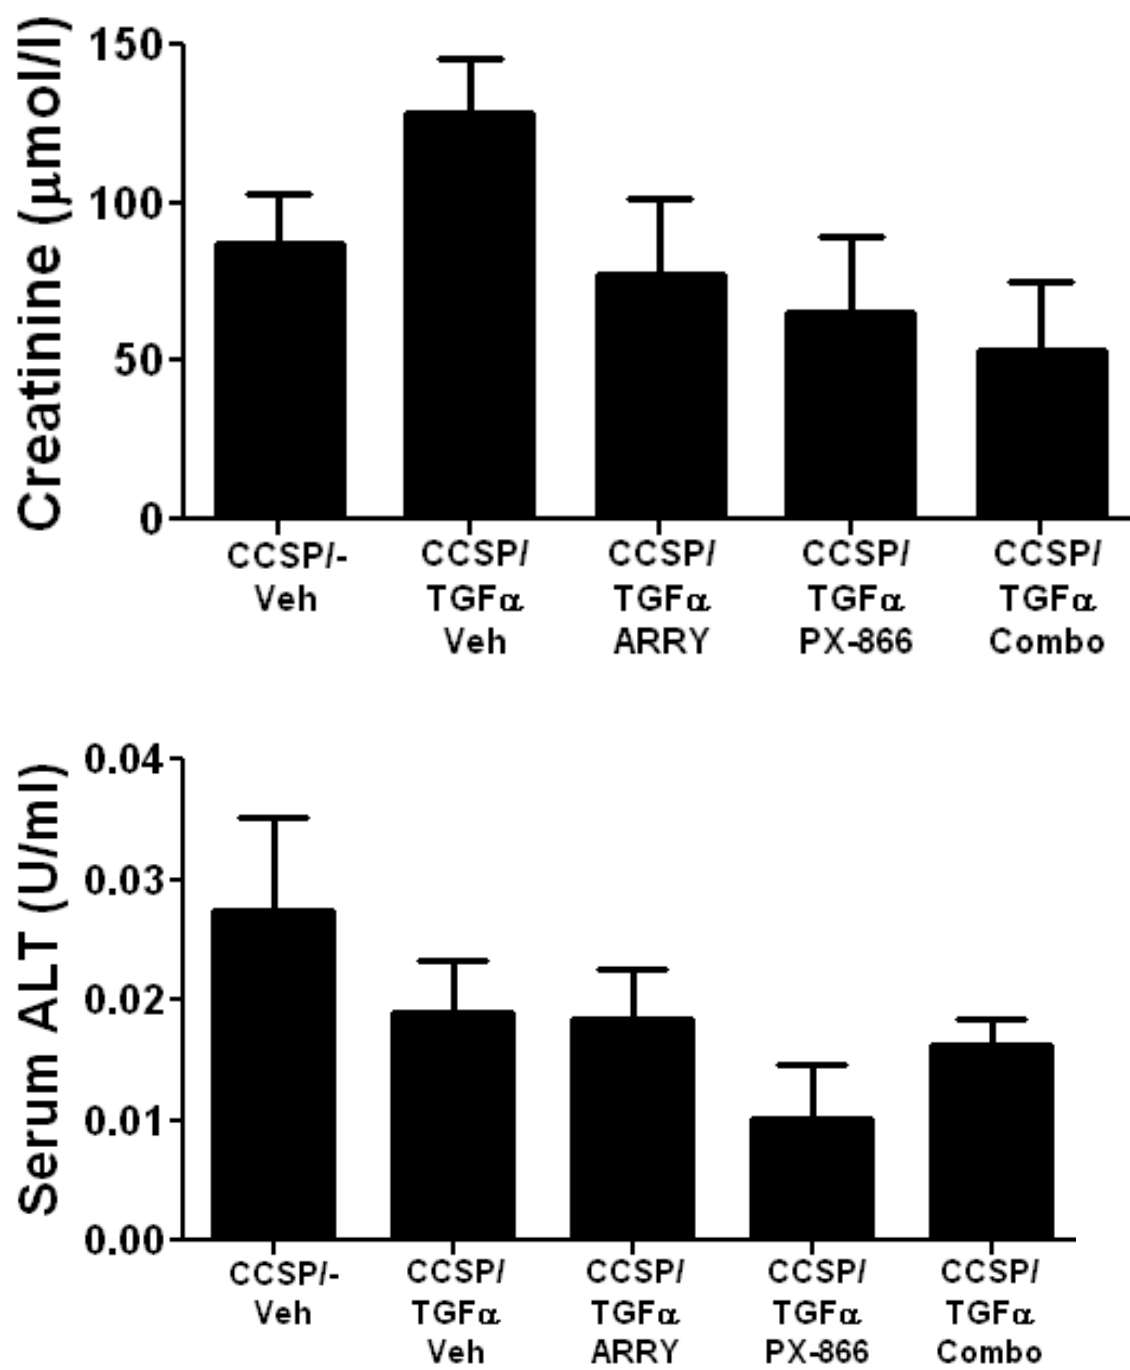

Supplement: pone.0086536.s001.pdf [file pone.0086536.s001.pdf]
